# Supplementary material
Source: PubMed Central journal article supplement (PMC7480402)

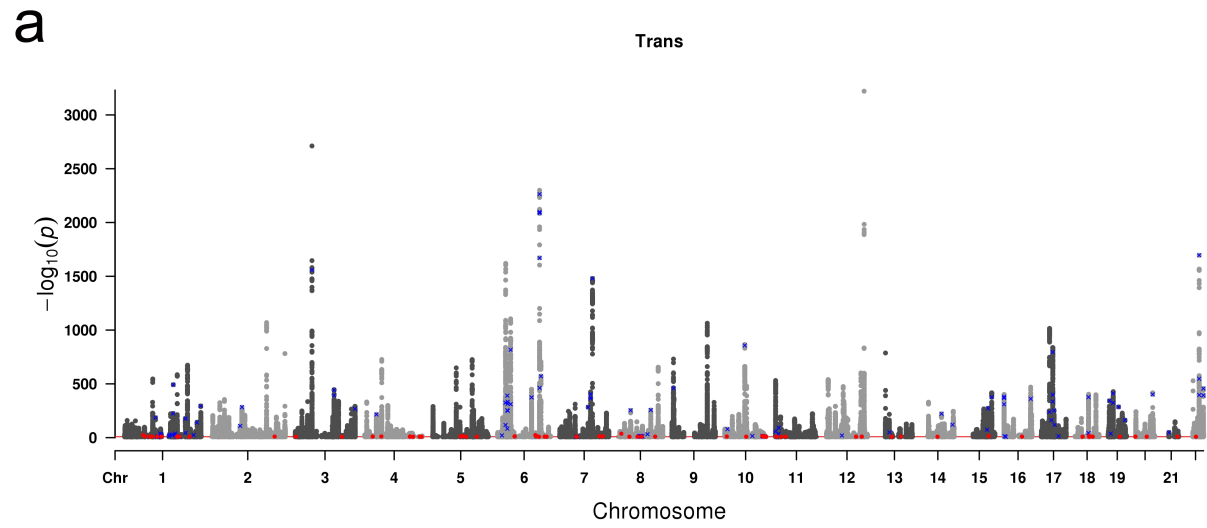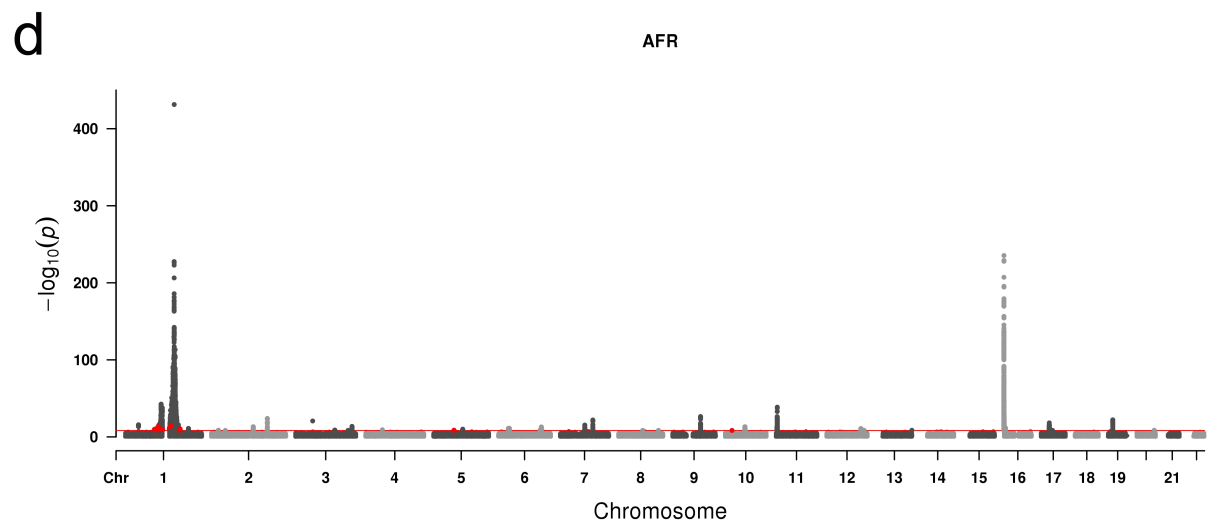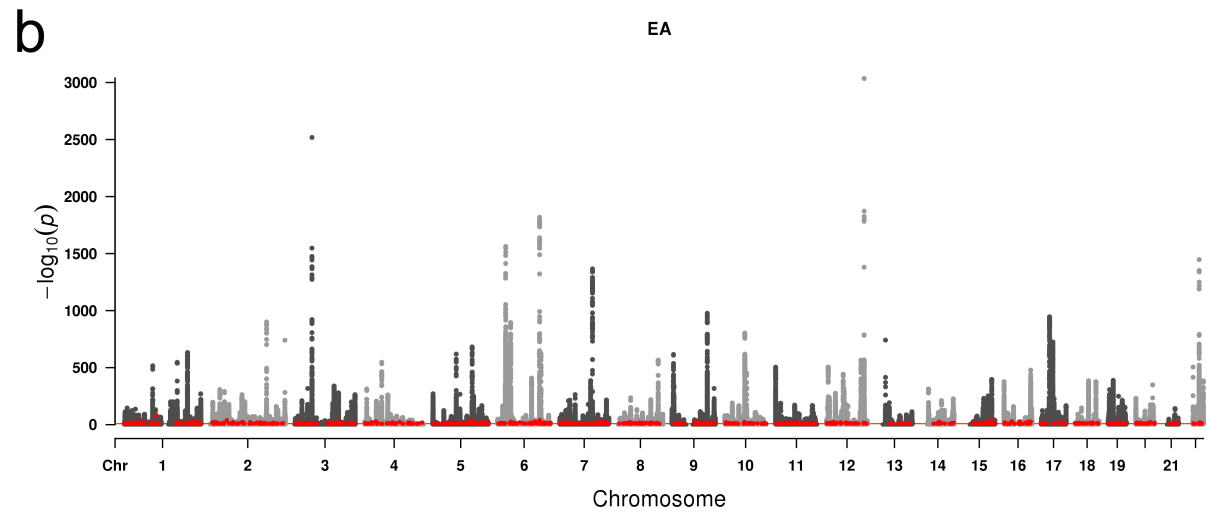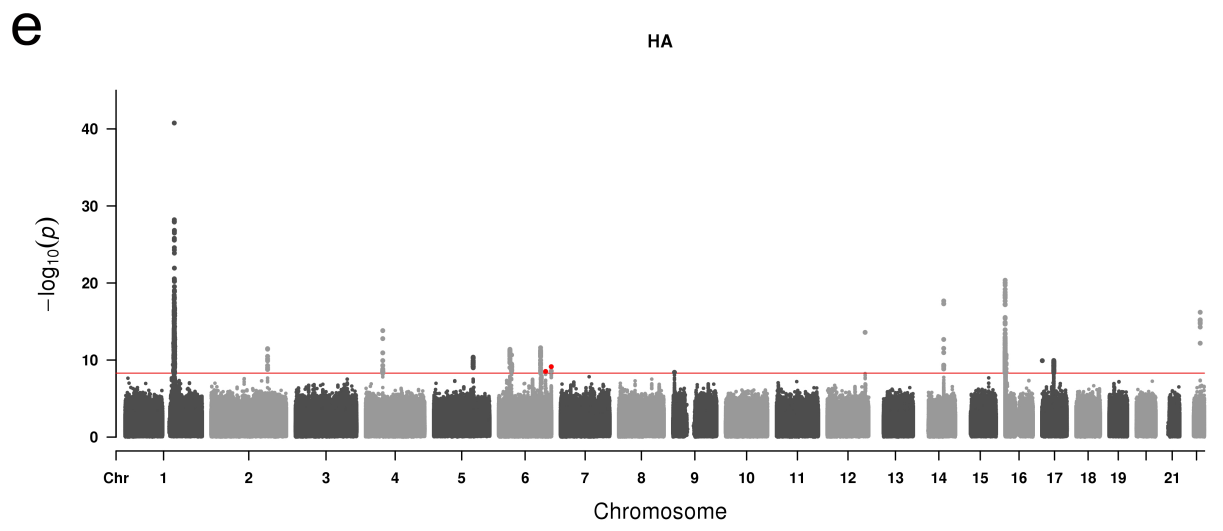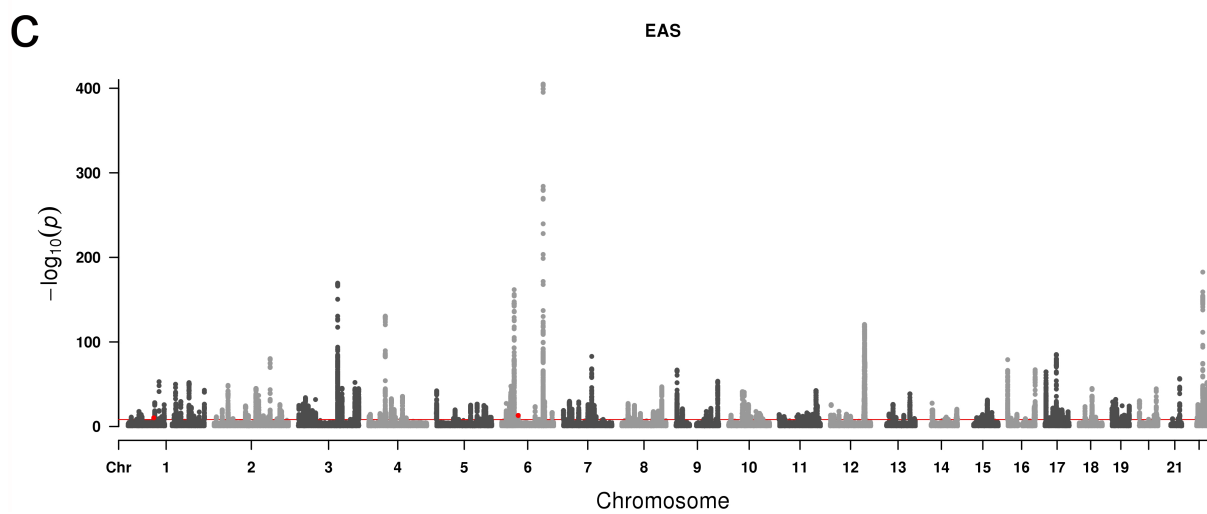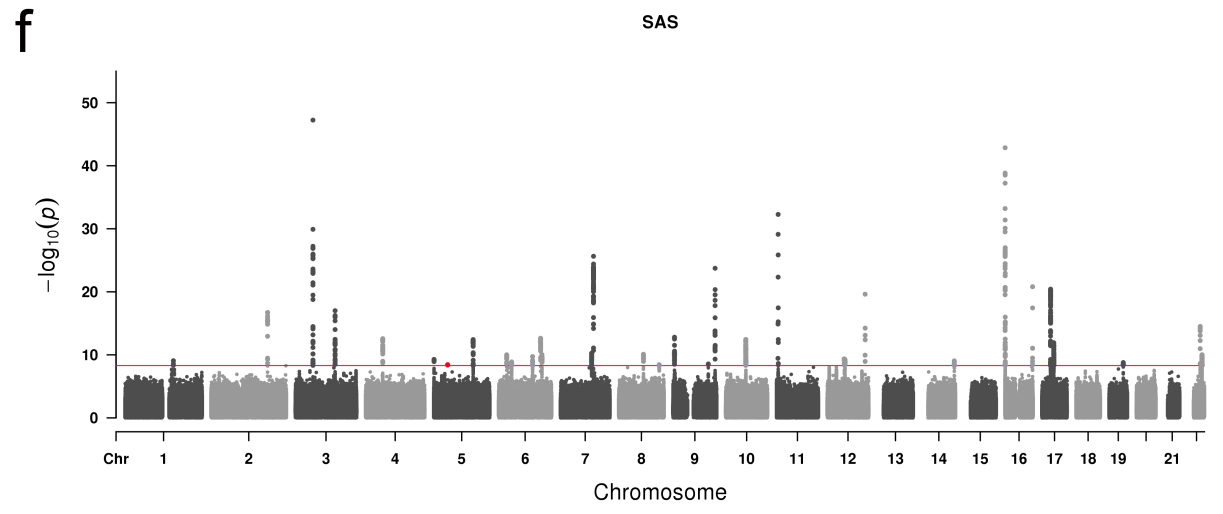

Supplement: NIHMS1609019-supplement-SF1.pdf [file NIHMS1609019-supplement-SF1.pdf]

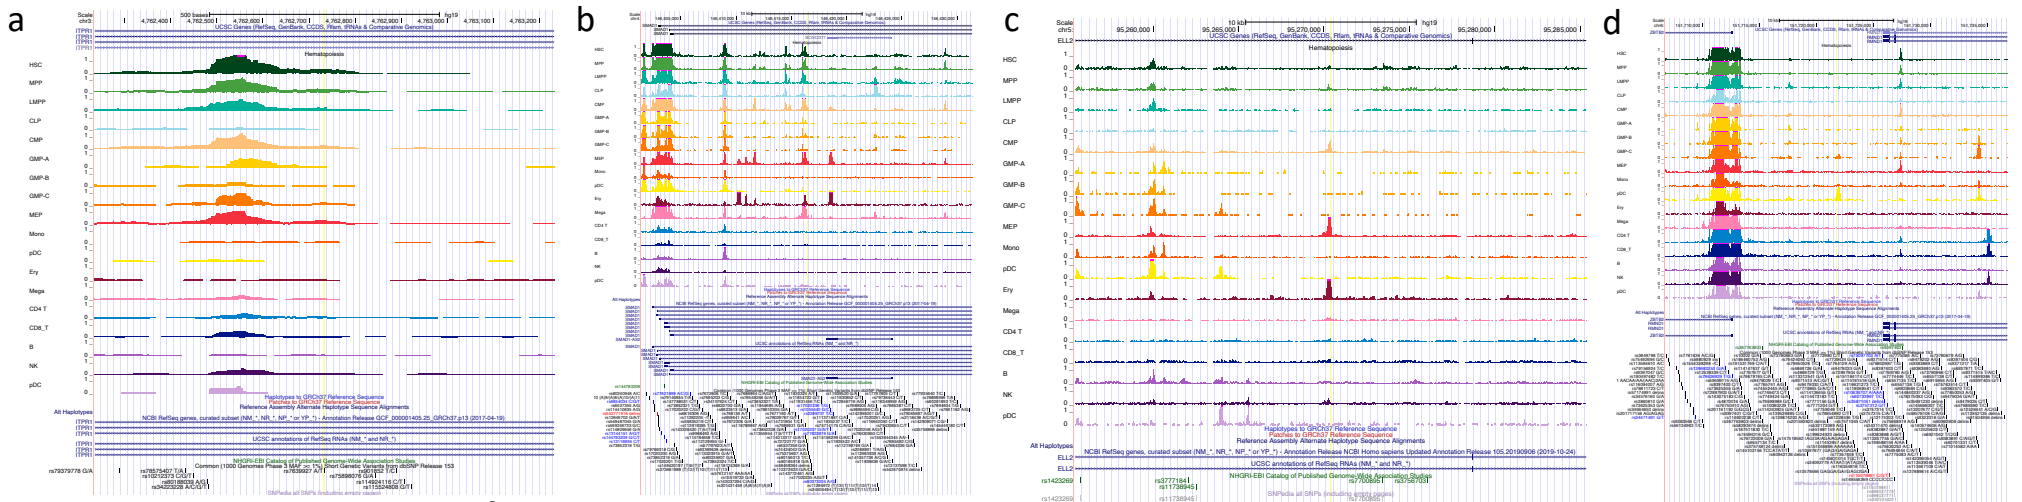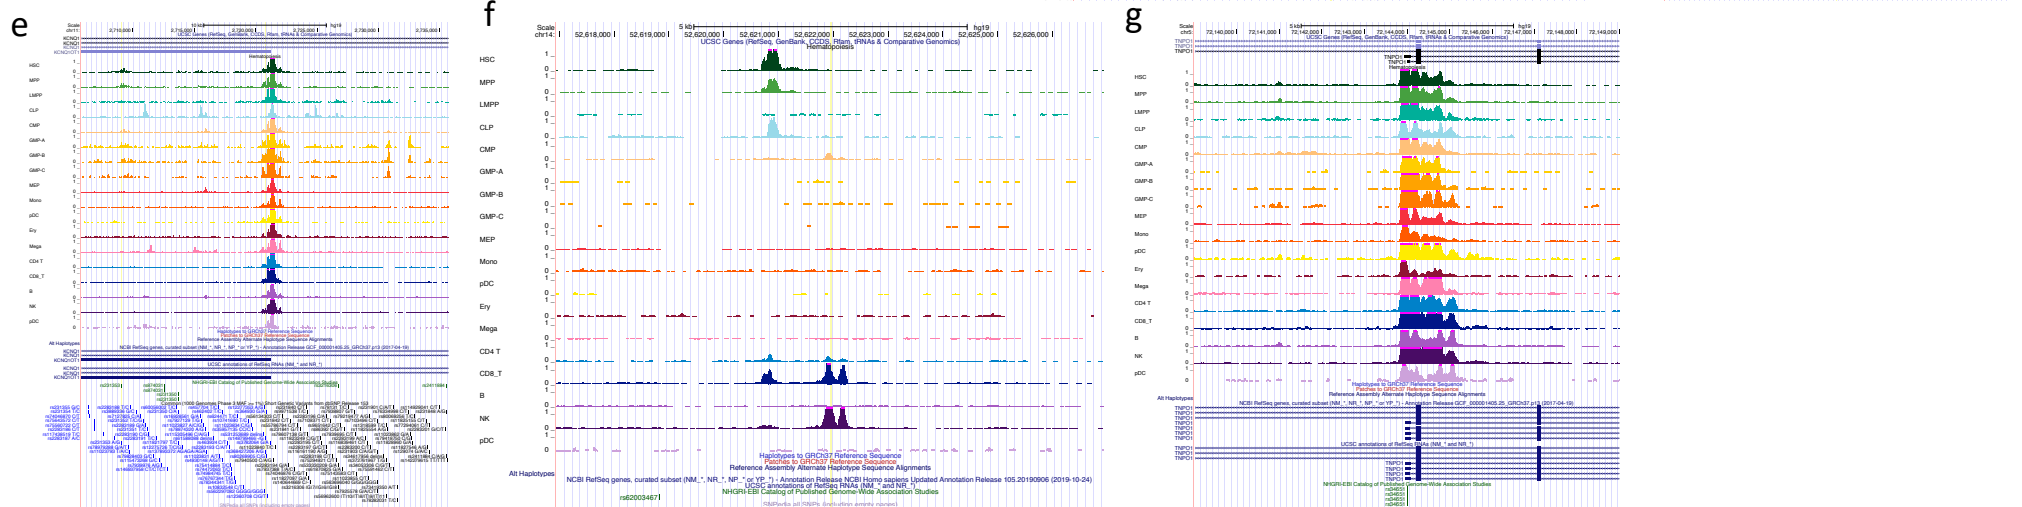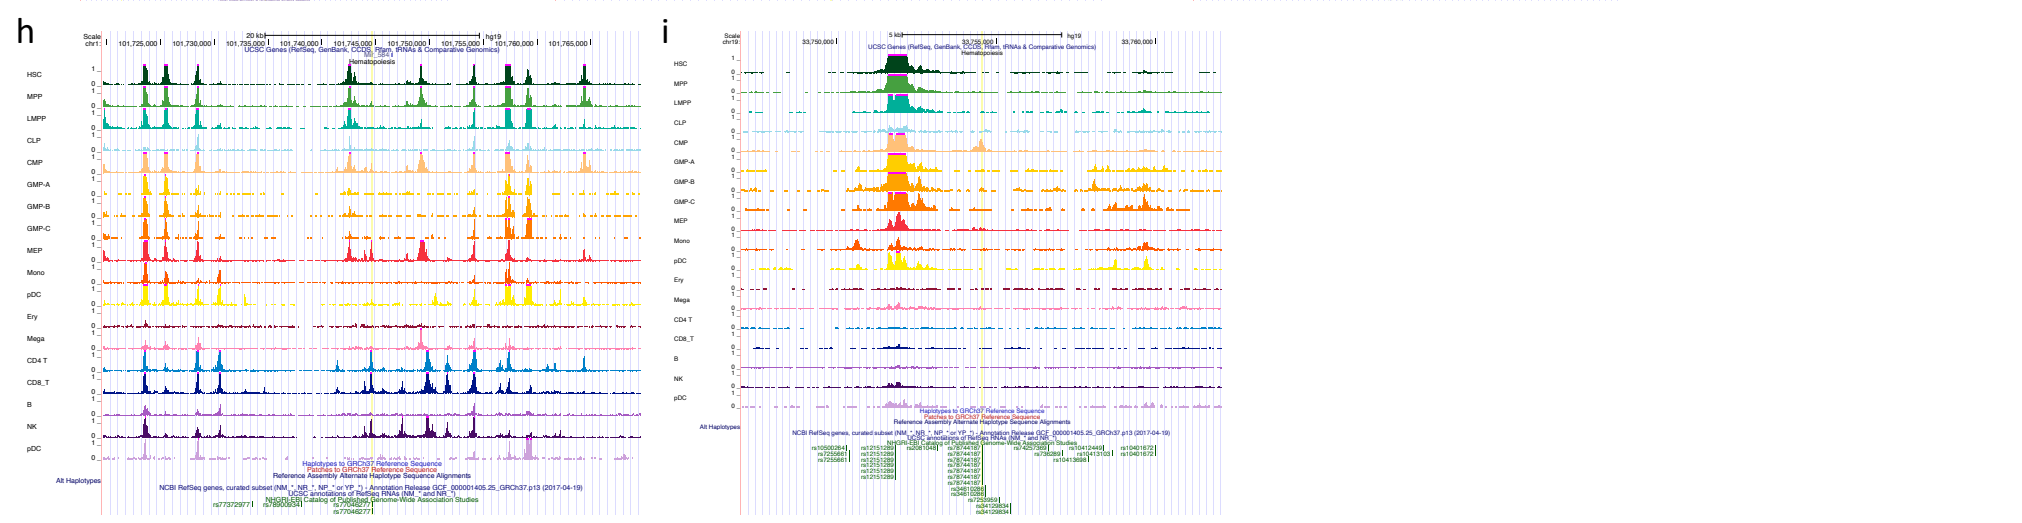

Supplement: NIHMS1609019-supplement-SF4.pdf [file NIHMS1609019-supplement-SF4.pdf]
